# Supplementary material for: Imprint of parity and age at first pregnancy on the genomic landscape of subsequent breast cancer
Source: Springer Nature journal article supplement (doi:10.1186/s13058-019-1111-6), 2019-02-15
Supplement: MOESM2 [file 16484860]

# Imprint of pregnancy and age at first pregnancy on the genomic landscape of breast cancer

## Additional file 2: Figure S1-S3

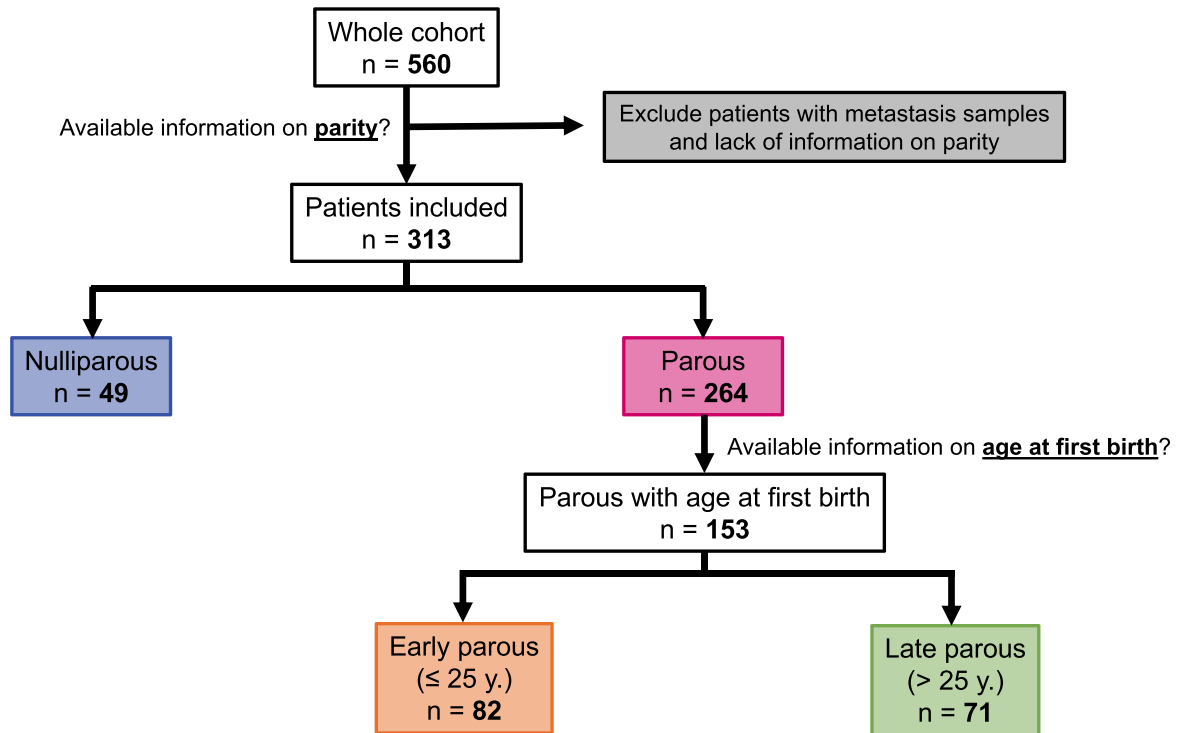

Figure S1. Flowchart summarizing the number of patients included in the analyses and the reasons for inclusion and exclusion

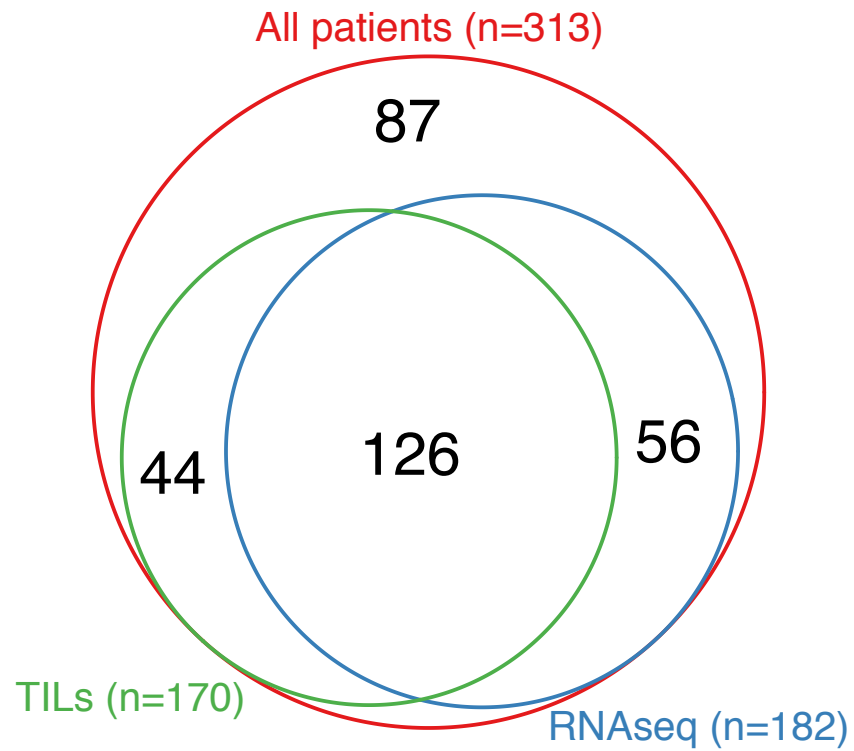

**Figure S2. Venn diagram summarizing the number of patients with available data**

313 patients (100%) had available somatic mutations and somatic copy number alterations (SCNAs) data (red circle) while 182 patients (58.1%) had available transcriptomic data (blue circle) and 170 patients (54.3%) had available information on TILs (green circle).

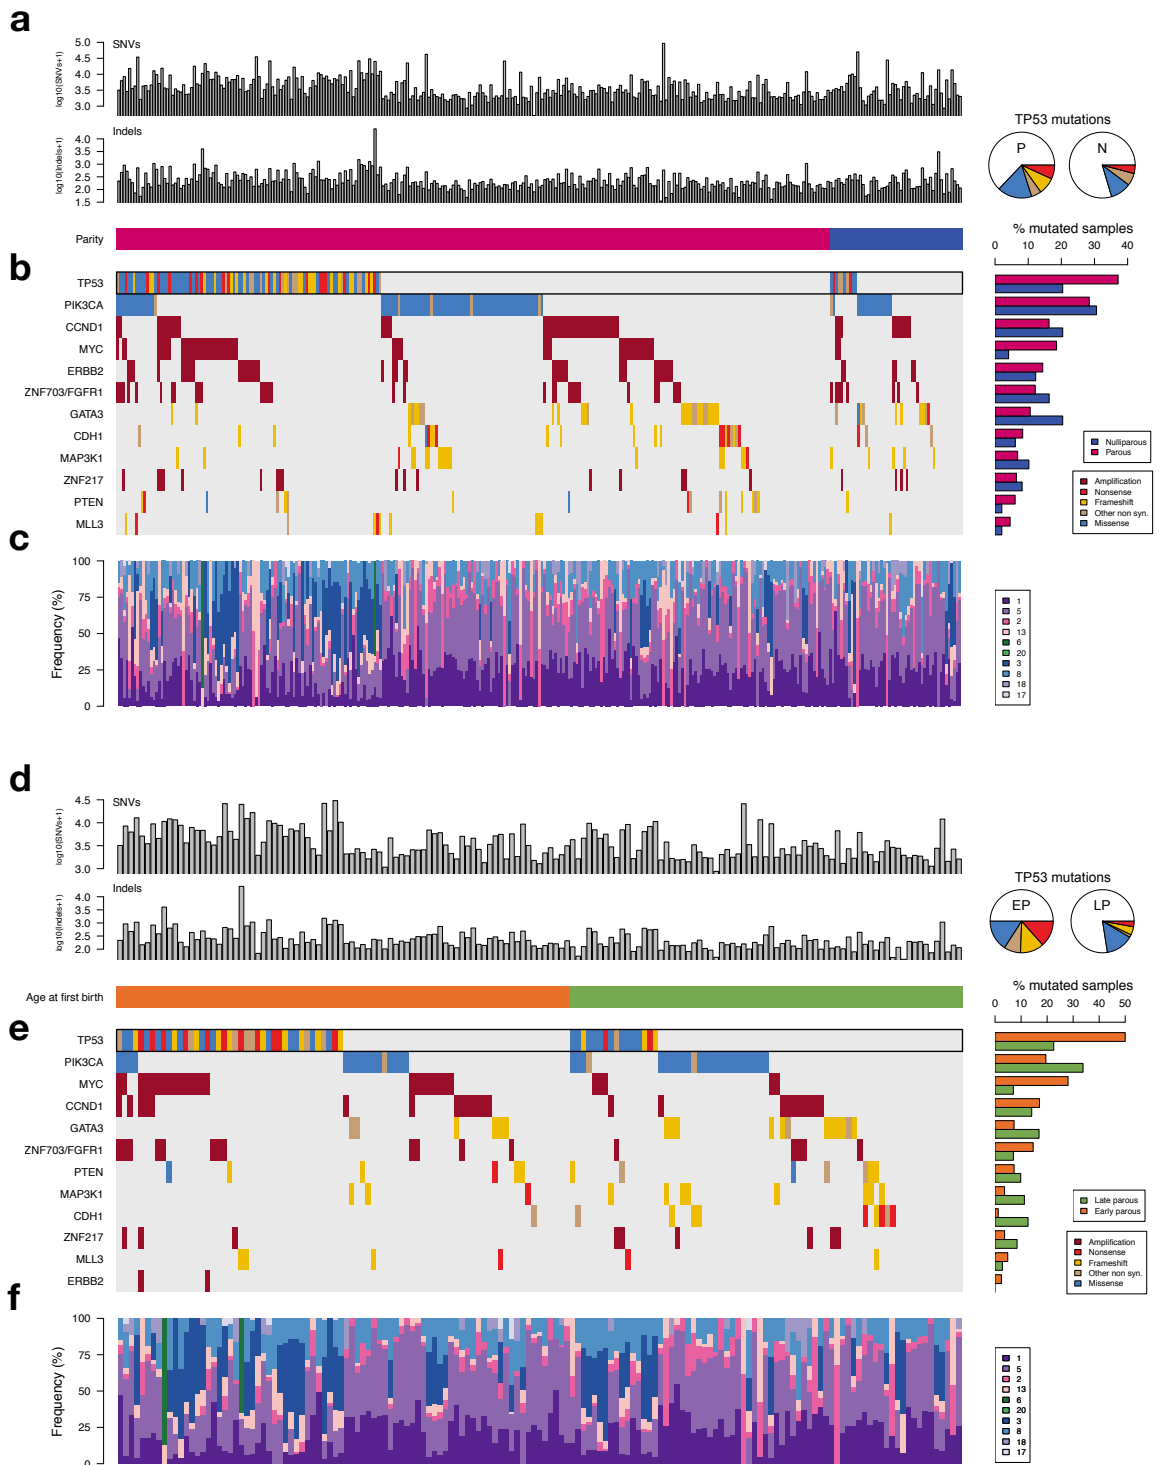

**Figure S3. Genomic landscape of breast cancer according to pregnancy and age at first pregnancy**

**(a)** Bar chart representing the absolute number of substitutions and indels in nulliparous and parous patients.

**(b)** Co-mutation plot showing genes harboring at least one non-silent mutation with a frequency of at least 5% across the whole cohort, and their corresponding frequencies in nulliparous and parous patients.

**(c)** Proportion of breast cancer substitution signatures in each sample. Signatures are colored according to broad biological groups: 1 and 5 are associated with clock-like processes, 2 and 13 are APOBEC-related, 20 and 26 are associated with mismatch- repair deficiency, 3 and 8 are associated with homologous-recombination deficiency.

**(d)** Bar chart representing the absolute number of substitutions and indels in early and late parous patients.

**(e)** Co-mutation plot showing genes harboring at least one non- silent mutation with a frequency of at least 5% across the whole cohort, and their corresponding frequencies in early and late parous patients.

**(f)** Proportion of breast cancer substitution signatures in each sample. Signatures are colored according to broad biological groups: 1 and 5 are associated with clock-like processes, 2 and 13 are APOBEC-related, 20 and 26 are associated with mismatch- repair deficiency, 3 and 8 are associated with homologous-recombination deficiency.
